# Supplementary material for: Mineral, thermal and deep groundwater of Hesse, Germany
Source: Copernicus journal article supplement (doi:10.5194/essd-2021-139), 2021-06-15
Supplement: Supplementary file [file essd-2021-139-AC2-supplement.pdf]

**Reply to comments of Referee #2**

|          |                                                                                                                                                                                                                                                                                                                                                                                                                                                                                                |                                                                                                                                                                                                                                                             |
|----------|------------------------------------------------------------------------------------------------------------------------------------------------------------------------------------------------------------------------------------------------------------------------------------------------------------------------------------------------------------------------------------------------------------------------------------------------------------------------------------------------|-------------------------------------------------------------------------------------------------------------------------------------------------------------------------------------------------------------------------------------------------------------|
| 2, 19    | The authors assume that many terms are understood by the readers, but I am not sure this is the case. For example, in Page 2, Line 15 you use the term 'formation water', without explanation. Same is for the term 'mineral water'. I think these terms are not broadly used and their scientific definition may not be clear for many readers. This is the case for many other terms. Please go over the paper and make sure you use the common terms / explain terms which are not trivial. | Definitions were already given in the manuscript, e.g. page 2, lines 20/21 or page 6, line 31 to page 7 line 1. We see no need for further definitions.                                                                                                     |
| 3, 10/11 | 'mineralisation increases. What does it mean? increase of EC? TDS? Density? Please clarify.                                                                                                                                                                                                                                                                                                                                                                                                    | From our perspective it is clear that TDS and therefore also EC and density increase. To avoid any doubts, we replaced 'mineralisation' by 'TDS' in the first part of the sentence, but maintained 'mineralized waters' in the second part of the sentence. |
| 8, 9     | It is not clear what the 'Light grey' referring to....?                                                                                                                                                                                                                                                                                                                                                                                                                                        | 'Light grey' is referring to certain fields in the database. We believe that this is clear from the context (title of section 2.4 and previous sentences).                                                                                                  |
